# Supplementary material for: Consistent Robustness Analysis (CRA) Identifies Biologically Relevant Properties of Regulatory Network Models
Source: PubMed Central journal article supplement (PMC3002950; doi:10.1371/journal.pone.0015589), 2010-12-16
Supplement: pone.0015589.s001.pdf [file pone.0015589.s001.pdf]

## Model Equations and parameters

### 1. The one-loop model

System of ordinary differential equations for the one-loop Arabidopsis circadian clock model developed by Locke *et al* (2005) [1] are given by:

$$\frac{dc_L^{(m)}}{dt} = q_1 c_P^{(n)} \Theta(t) + \frac{n_1 c_X^{(n)^a}}{g_1 + c_X^{(n)^a}} - \frac{m_1 c_L^{(m)}}{k_1 + c_L^{(m)}} \quad (S1)$$

$$\frac{dc_L^{(c)}}{dt} = p_1 c_L^{(m)} - r_1 c_L^{(c)} + r_2 c_L^{(n)} - \frac{m_2 c_L^{(c)}}{k_2 + c_L^{(c)}} \quad (S2)$$

$$\frac{dc_L^{(n)}}{dt} = r_1 c_L^{(c)} - r_2 c_L^{(n)} - \frac{m_3 c_L^{(n)}}{k_3 + c_L^{(n)}} \quad (S3)$$

$$\frac{dc_T^{(m)}}{dt} = \frac{n_2}{g_2 + c_L^{(n)^b}} - \frac{m_4 c_T^{(m)}}{k_4 + c_T^{(m)}} \quad (S4)$$

$$\frac{dc_T^{(c)}}{dt} = p_2 c_T^{(m)} - r_3 c_T^{(c)} + r_4 c_T^{(n)} - \frac{m_5 c_T^{(c)}}{k_5 + c_T^{(c)}} \quad (S5)$$

$$\frac{dc_T^{(n)}}{dt} = r_3 c_T^{(c)} - r_4 c_T^{(n)} - \frac{m_6 c_T^{(n)}}{k_6 + c_T^{(n)}} \quad (S6)$$

$$\frac{dc_P^{(n)}}{dt} = (1 - \Theta(t)) p_3 - \frac{m_7 c_P^{(n)}}{k_7 + c_P^{(n)}} - q_2 \Theta(t) c_P^{(n)} \quad (S7)$$

$L$ ,  $T$  and  $P$  denote *LHY*, *TOC1* genes and P-protein while  $m$ ,  $c$  and  $n$  indicate molecular entities and their location in the model, i.e. mRNA, protein in cytoplasm, and protein in nucleus, respectively.  $\Theta(t)$  is a step function of light input to the model which set to be 1 in daytime and 0 in night-time. The parameters in Equation S7 were fixed to a constant ( $p_3 = 0.5$ ,  $q_2 = 1$  and  $m_7 = k_7 = 1.2$ ) for all calculation. The parameters giving a good fit to the experimental data are listed in Table S1.

**Table S1** Reference parameter sets for one-loop model

| P-ID | P_ref | Description                                                | L2     | L26     | L31    | L32     | L37    | L41    | L50    |
|------|-------|------------------------------------------------------------|--------|---------|--------|---------|--------|--------|--------|
| P1   | $q1$  | Coupling constant of light activation of LHY transcription | 3.1666 | 1.3012  | 2.5364 | 1.4239  | 3.1863 | 2.7202 | 0.8757 |
| P2   | $n1$  | Max. light-dependent LHY transcription rate                | 1.0989 | 21.9703 | 0.6138 | 0.8002  | 1.4607 | 2.4012 | 0.5103 |
| P3   | $g1$  | Constant of activation by                                  | 5.536  | 4.7955  | 0.2619 | 21.7911 | 5.4946 | 5.9663 | 0.5829 |

|     |           |                                                   |         |        |          |         |        |        |         |
|-----|-----------|---------------------------------------------------|---------|--------|----------|---------|--------|--------|---------|
|     |           | protein X                                         |         |        |          |         |        |        |         |
| P4  | <i>m1</i> | Max. rate of LHY mRNA degradation                 | 4.8681  | 1.0918 | 1.5846   | 2.256   | 4.9998 | 4.1488 | 0.5549  |
| P5  | <i>k1</i> | Michaelis constant of LHY mRNA degradation        | 4.6555  | 1.3569 | 1.185    | 2.7057  | 10.909 | 0.7151 | 0.3175  |
| P6  | <i>p1</i> | Rate constant of LHY mRNA translation             | 2.3546  | 0.4406 | 1.3504   | 14.5907 | 1.8309 | 3.3273 | 1.888   |
| P7  | <i>r1</i> | Rate constant of LHY transport into nucleus       | 5.6125  | 1.2781 | 0.267    | 0.6619  | 1.5    | 8.4697 | 15.5308 |
| P8  | <i>r2</i> | Rate constant of LHY transport out of nucleus     | 10.2606 | 0.7005 | 0.0724   | 1.0381  | 1.6581 | 3.0762 | 0.5855  |
| P9  | <i>m2</i> | Max. rate of cytoplasmic LHY degradation          | 1.9998  | 0.449  | 0.1265   | 0.3448  | 2.6183 | 9.0808 | 0.385   |
| P10 | <i>k2</i> | Michaelis constant of cytoplasmic LHY degradation | 3.3853  | 0.1721 | 144.4148 | 1.8125  | 0.9945 | 2.8632 | 0.0116  |
| P11 | <i>m3</i> | Max. rate of nuclear LHY degradation              | 1.6496  | 0.0635 | 0.7823   | 2.9233  | 0.4034 | 1.2364 | 0.462   |
| P12 | <i>k3</i> | Michaelis constant of nuclear LHY degradation     | 1.3424  | 0.3455 | 0.0378   | 0.0428  | 0.1175 | 3.9305 | 0.3389  |
| P13 | <i>n2</i> | Max. TOC1 transcription rate                      | 1.0304  | 0.1024 | 0.363    | 9.9479  | 7.6157 | 4.4108 | 8.3177  |
| P14 | <i>g2</i> | Constant of activation by TOC1                    | 1.4531  | 0.0101 | 0.2506   | 3.6589  | 0.7033 | 1.1192 | 1.0426  |
| P15 | <i>m4</i> | Max. rate of TOC1 mRNA degradation                | 3.8873  | 13.854 | 2.2049   | 30.6524 | 15.502 | 4.6163 | 9.1262  |
| P16 | <i>k4</i> | Michaelis constant of TOC1 mRNA degradation       | 6.8398  | 0.7804 | 0.3991   | 3.9875  | 0.6635 | 8.4728 | 0.14    |
| P17 | <i>p2</i> | Rate constant of TOC1 mRNA translation            | 7.4944  | 0.7897 | 0.7256   | 8.0792  | 2.2714 | 0.5303 | 0.629   |
| P18 | <i>r3</i> | Rate constant of TOC1 transport into nucleus      | 3.1687  | 0.0036 | 2.0362   | 4.9074  | 0.0537 | 5.4225 | 0.1808  |
| P19 | <i>r4</i> | Rate constant of TOC1 transport out of nucleus    | 1.4383  | 0.1974 | 0.0023   | 0.682   | 0.0161 | 2.7472 | 0.0018  |

|     |      |                                                    |        |        |         |        |         |        |        |
|-----|------|----------------------------------------------------|--------|--------|---------|--------|---------|--------|--------|
| P20 | $m5$ | Max. rate of cytoplasmic TOC1 degradation          | 6.2541 | 1.0602 | 0.1     | 0.9868 | 2.7194  | 4.2634 | 0.3836 |
| P21 | $k5$ | Michaelis constant of cytoplasmic TOC1 degradation | 0.0829 | 0.0712 | 216.756 | 0.4102 | 10.3796 | 0.1124 | 0.5003 |
| P22 | $m6$ | Max. rate of nuclear TOC1 degradation              | 0.0275 | 0.0013 | 0.4586  | 1.8897 | 1.1916  | 2.076  | 0.1836 |
| P23 | $k6$ | Michaelis constant of nuclear TOC1 degradation     | 0.4506 | 2.8329 | 0.0075  | 0.1485 | 0.476   | 0.3477 | 0.0048 |
| P24 | $a$  | Hill coefficient of repression by protein LHY      | 2.174  | 2.0819 | 1.6336  | 1.7532 | 2       | 2      | 2.0407 |
| P25 | $b$  | Hill coefficient of activation by protein TOC1     | 0.8868 | 1.0142 | 1.0152  | 0.9489 | 1       | 1      | 0.8571 |

## 2. The two-loop model

Two-loop model was later extended from one-loop model by Locke *et al* (2005) [2]

which can be described as followed:

$$\frac{dc_L^{(m)}}{dt} = q_1 c_P^{(n)} \Theta(t) + \frac{n_1 c_X^{(n)a}}{g_1 + c_X^{(n)a}} - \frac{m_1 c_L^{(m)}}{k_1 + c_L^{(m)}} \quad (S8)$$

$$\frac{dc_L^{(c)}}{dt} = p_1 c_L^{(m)} - r_1 c_L^{(c)} + r_2 c_L^{(n)} - \frac{m_2 c_L^{(c)}}{k_2 + c_L^{(c)}} \quad (S9)$$

$$\frac{dc_L^{(n)}}{dt} = r_1 c_L^{(c)} - r_2 c_L^{(n)} - \frac{m_3 c_L^{(n)}}{k_3 + c_L^{(n)}} \quad (S10)$$

$$\frac{dc_T^{(m)}}{dt} = \left( \frac{n_2 c_Y^{(n)b}}{g_2 + c_Y^{(n)b}} \right) \left( \frac{n_3}{g_3 + c_L^{(n)b}} \right) - \frac{m_4 c_T^{(m)}}{k_4 + c_T^{(m)}} \quad (S11)$$

$$\frac{dc_T^{(c)}}{dt} = p_2 c_T^{(m)} - r_3 c_T^{(c)} + r_4 c_T^{(n)} - \left( (1 - \Theta(t)) m_5 + m_6 \right) \frac{c_T^{(c)}}{k_5 + c_T^{(c)}} \quad (S12)$$

$$\frac{dc_T^{(n)}}{dt} = r_3 c_T^{(c)} - r_4 c_T^{(n)} - \left( (1 - \Theta(t)) m_7 + m_8 \right) \frac{c_T^{(n)}}{k_6 + c_T^{(n)}} \quad (S13)$$

$$\frac{dc_X^{(m)}}{dt} = \frac{n_4 c_T^{(n)c}}{g_4 + c_X^{(n)c}} - \frac{m_9 c_X^{(m)}}{k_7 + c_X^{(m)}} \quad (S14)$$

$$\frac{dc_X^{(c)}}{dt} = p_3 c_X^{(m)} - r_5 c_X^{(c)} + r_6 c_X^{(n)} - \frac{m_{10} c_X^{(c)}}{k_8 + c_X^{(c)}} \quad (S15)$$

$$\frac{dc_X^{(n)}}{dt} = r_5 c_X^{(c)} - r_6 c_X^{(n)} - \frac{m_{11} c_X^{(n)}}{k_{93} + c_X^{(n)}} \quad (S16)$$

$$\frac{dc_Y^{(m)}}{dt} = \left( \Theta(t) q_2 c_P^{(n)} + \frac{(\Theta(t) n_5 + n_6)}{g_5 + c_T^{(n)d}} \right) \left( \frac{n_7}{g_6 + c_L^{(n)e}} \right) - \frac{m_{12} c_Y^{(m)}}{k_{10} + c_Y^{(m)}} \quad (S17)$$

$$\frac{dc_Y^{(c)}}{dt} = p_4 c_Y^{(m)} - r_7 c_Y^{(c)} + r_8 c_Y^{(n)} - \frac{m_{13} c_Y^{(c)}}{k_{11} + c_Y^{(c)}} \quad (S18)$$

$$\frac{dc_Y^{(n)}}{dt} = r_7 c_Y^{(c)} - r_8 c_Y^{(n)} - \frac{m_{14} c_Y^{(n)}}{k_{12} + c_Y^{(n)}} \quad (S19)$$

$$\frac{dc_P^{(n)}}{dt} = (1 - \Theta(t)) p_5 - \frac{m_{15} c_P^{(n)}}{k_{13} + c_P^{(n)}} - q_3 \Theta(t) c_P^{(n)} \quad (S20)$$

The additional variable denoted  $X$  and  $Y$  represent hypothetical genes  $X$  and  $Y$ , respectively. In the similar manner to one-loop model, the kinetics of P-protein explained in Equation S20 were fixed ( $p_5 = 0.5$ ,  $q_3 = 1$  and  $m_{15} = k_{13} = 1.2$ ) for all calculation. A group of best fit parameter sets are listed in Table S2.

**Table S2** Reference parameter sets for two-loop model

| P-ID | P_ref | Description                                                | L0      | L9      | L12     | L13      | L14    | L27    | L39     |
|------|-------|------------------------------------------------------------|---------|---------|---------|----------|--------|--------|---------|
| P1   | $q1$  | Coupling constant of light activation of LHY transcription | 2.5759  | 3.8413  | 2.5367  | 1.7231   | 2.2018 | 1.2087 | 3.7329  |
| P2   | $n1$  | Max. light-dependent LHY transcription rate                | 5.1495  | 1.6058  | 0.6792  | 3.2804   | 0.8771 | 0.599  | 3.5951  |
| P3   | $g1$  | Constant of activation by protein X                        | 0.6717  | 0.2428  | 1.3939  | 7.4018   | 0.2504 | 0.6314 | 0.1009  |
| P4   | $m1$  | Max. rate of LHY mRNA degradation                          | 1.5912  | 3.0014  | 2.0259  | 5.0267   | 2.0428 | 1.3876 | 16.1289 |
| P5   | $k1$  | Michaelis constant of LHY mRNA degradation                 | 1.8528  | 1.9837  | 2.7764  | 5.0965   | 4.9709 | 0.9156 | 4.9657  |
| P6   | $p1$  | Rate constant of LHY mRNA translation                      | 0.8128  | 0.1885  | 44.5794 | 1.7025   | 1.5149 | 4.0477 | 0.6933  |
| P7   | $r1$  | Rate constant of LHY transport into nucleus                | 17.2388 | 77.0779 | 0.8139  | 4.9858   | 6.6294 | 0.1715 | 8.6249  |
| P8   | $r2$  | Rate constant of LHY transport out of nucleus              | 0.1778  | 1.5279  | 0.5301  | 1.0864   | 0.9658 | 1.539  | 16.5107 |
| P9   | $m2$  | Max. rate of cytoplasmic LHY degradation                   | 21.1058 | 67.0401 | 77.0427 | 128.7237 | 1.3078 | 3.6355 | 5.5115  |

|     |           |                                                                    |        |         |         |         |          |         |        |
|-----|-----------|--------------------------------------------------------------------|--------|---------|---------|---------|----------|---------|--------|
| P10 | <i>k2</i> | Michaelis constant of cytoplasmic LHY degradation                  | 1.6292 | 7.8909  | 3.131   | 17.4919 | 1.0333   | 16.9954 | 4.2174 |
| P11 | <i>m3</i> | Max. rate of nuclear LHY degradation                               | 3.5018 | 0.399   | 1.0242  | 1.9527  | 8.2634   | 0.1083  | 1.3385 |
| P12 | <i>k3</i> | Michaelis constant of nuclear LHY degradation                      | 1.2565 | 1.0606  | 0.2078  | 2.3396  | 1.5385   | 1.1721  | 1.605  |
| P13 | <i>n2</i> | Max. <i>TOC1</i> transcription rate                                | 1.4233 | 0.4302  | 3.8828  | 3.6335  | 1.7983   | 2.6984  | 1.8479 |
| P14 | <i>g2</i> | Constant of activation by protein Y                                | 0.0333 | 2.7987  | 0.2446  | 2.3172  | 0.0192   | 2.6659  | 7.8532 |
| P15 | <i>n3</i> | Constant regulation by protein Y                                   | 0.5251 | 21.5704 | 2.041   | 3.5802  | 8.7261   | 8.5338  | 0.1641 |
| P16 | <i>g3</i> | Constant of repression by protein LHY                              | 0.266  | 0.1516  | 0.0706  | 0.2275  | 0.1876   | 3.5819  | 0.0179 |
| P17 | <i>m4</i> | Max. rate of <i>TOC1</i> mRNA degradation                          | 3.9748 | 8.5773  | 15.923  | 2.4186  | 108.4974 | 7.8459  | 0.7966 |
| P18 | <i>k4</i> | Michaelis constant of <i>TOC1</i> mRNA degradation                 | 2.4823 | 12.2813 | 6.6023  | 2.1043  | 102.0495 | 3.431   | 4.7869 |
| P19 | <i>p2</i> | Rate constant of <i>TOC1</i> mRNA translation                      | 4.2228 | 0.1273  | 0.5086  | 0.1675  | 0.1692   | 4.8662  | 0.3081 |
| P20 | <i>r3</i> | Rate constant of <i>TOC1</i> transport into nucleus                | 0.323  | 8.3445  | 9.5851  | 0.994   | 0.1696   | 1.4029  | 0.7487 |
| P21 | <i>r4</i> | Rate constant of <i>TOC1</i> transport out of nucleus              | 1.9641 | 0.4903  | 3.1533  | 0.4668  | 0.2308   | 2.7209  | 0.1818 |
| P22 | <i>m5</i> | Max. rate of light dependent cytoplasmic <i>TOC1</i> degradation   | 0.0012 | 0.7468  | 0.0018  | 1.5405  | 0.0225   | 0.8928  | 0.0133 |
| P23 | <i>m6</i> | Max. rate of light independent cytoplasmic <i>TOC1</i> degradation | 3.2372 | 2.3301  | 0.0368  | 1.4918  | 4.5318   | 2.2566  | 0.2589 |
| P24 | <i>k5</i> | Michaelis constant of cytoplasmic <i>TOC1</i> degradation          | 2.9809 | 6.2478  | 6.1054  | 9.2669  | 0.686    | 1.1228  | 2.5309 |
| P25 | <i>m7</i> | Max. rate of light dependent nuclear <i>TOC1</i> degradation       | 0.0521 | 0.1789  | 0.0147  | 1.3708  | 0.009    | 1.12    | 0.3794 |
| P26 | <i>m8</i> | Max. rate of light independent nuclear <i>TOC1</i> degradation     | 3.897  | 1.7547  | 11.4511 | 22.0606 | 3.0372   | 4.7235  | 6.7745 |
| P27 | <i>k6</i> | Michaelis constant of nuclear <i>TOC1</i> degradation              | 0.3722 | 4.2643  | 0.8095  | 2.3301  | 0.6446   | 6.2498  | 6.9043 |

|     |            |                                                                |         |        |         |         |        |        |        |
|-----|------------|----------------------------------------------------------------|---------|--------|---------|---------|--------|--------|--------|
| P28 | <i>n4</i>  | Max. <i>X</i> transcription rate                               | 0.2213  | 0.305  | 0.4354  | 1.9754  | 0.2373 | 1.1581 | 0.1162 |
| P29 | <i>g4</i>  | Constant of activation by protein TOC1                         | 0.4181  | 0.6339 | 0.1051  | 1.4192  | 0.0057 | 4.3917 | 0.1566 |
| P30 | <i>m9</i>  | Max. rate of <i>X</i> mRNA degradation                         | 9.9471  | 0.8853 | 0.4175  | 2.6405  | 0.3617 | 2.8288 | 1.1757 |
| P31 | <i>k7</i>  | Michaelis constant of <i>X</i> mRNA degradation                | 6.5903  | 1.6147 | 1.6033  | 0.3191  | 1.8639 | 2.9283 | 4.9187 |
| P32 | <i>p3</i>  | Rate constant of <i>X</i> mRNA translation                     | 2.1317  | 7.4982 | 1.4074  | 10.6624 | 0.3469 | 5.395  | 0.3045 |
| P33 | <i>r5</i>  | Rate constant of protein <i>X</i> transport into nucleus       | 1.0439  | 1.3821 | 2.3817  | 1.2937  | 1.3362 | 9.2475 | 0.8694 |
| P34 | <i>r6</i>  | Rate constant of protein <i>X</i> transport out of nucleus     | 3.3344  | 0.7193 | 18.7256 | 0.5752  | 3.2545 | 1.9791 | 0.4407 |
| P35 | <i>m10</i> | Max. rate of degradation of cytoplasmic protein <i>X</i>       | 0.2069  | 0.2177 | 0.4077  | 0.0779  | 1.2357 | 4.7809 | 0.4554 |
| P36 | <i>k8</i>  | Michaelis constant of cytoplasmic protein <i>X</i> degradation | 0.6613  | 0.1848 | 0.1237  | 1.1925  | 3.4668 | 0.1466 | 0.5613 |
| P37 | <i>m11</i> | Max. rate of degradation of nuclear protein <i>X</i>           | 3.3455  | 5.2661 | 4.1432  | 0.0065  | 0.0397 | 1.6864 | 0.0323 |
| P38 | <i>k9</i>  | Michaelis constant of nuclear protein <i>X</i> degradation     | 17.9958 | 1.5912 | 2.5313  | 0.5228  | 0.4122 | 0.8041 | 2.1029 |
| P39 | <i>n5</i>  | Light dependent component of <i>Y</i> transcription            | 1.9755  | 0.0257 | 0.2275  | 0.3728  | 0.0228 | 0.1646 | 0.0344 |
| P40 | <i>n6</i>  | Light independent component of <i>Y</i> transcription          | 3.4709  | 0.4373 | 4.546   | 4.0605  | 1.4893 | 4.6144 | 0.7489 |
| P41 | <i>g5</i>  | Constant of repression by TOC1                                 | 1.7594  | 1.2635 | 0.026   | 0.0466  | 0.2168 | 4.5496 | 0.1729 |
| P42 | <i>m12</i> | Max. rate of <i>Y</i> mRNA degradation                         | 4.1362  | 0.5178 | 0.8096  | 3.1375  | 2.1834 | 1.2943 | 0.4397 |
| P43 | <i>k10</i> | Michaelis constant of <i>Y</i> mRNA degradation                | 1.7396  | 0.6616 | 1.9072  | 5.4739  | 2.2283 | 1.5324 | 0.1276 |
| P44 | <i>p4</i>  | Rate constant of <i>Y</i> mRNA translation                     | 0.266   | 1.7086 | 0.0116  | 0.4371  | 0.0095 | 0.3691 | 1.34   |
| P45 | <i>r7</i>  | Rate constant of protein <i>Y</i> transport into nucleus       | 2.0966  | 3.527  | 11.3545 | 7.3215  | 7.8454 | 4.6565 | 5.773  |
| P46 | <i>r8</i>  | Rate constant of protein <i>Y</i> transport out of nucleus     | 0.1866  | 0.5981 | 0.4384  | 2.035   | 0.0612 | 0.7638 | 0.166  |

|     |            |                                                          |         |        |         |          |         |         |         |
|-----|------------|----------------------------------------------------------|---------|--------|---------|----------|---------|---------|---------|
| P47 | <i>m13</i> | Max. rate of degradation of cytoplasmic protein Y        | 0.1195  | 1.3338 | 1.6329  | 3.3043   | 0.0036  | 1.164   | 0.1117  |
| P48 | <i>k11</i> | Michaelis constant of cytoplasmic protein Y degradation  | 1.9429  | 0.3107 | 0.1667  | 0.8502   | 1.4187  | 5.9689  | 8.082   |
| P49 | <i>m14</i> | Max. rate of degradation of nuclear protein Y            | 0.5921  | 0.0401 | 0.4615  | 0.5603   | 0.148   | 0.2348  | 5.3312  |
| P50 | <i>k12</i> | Michaelis constant of nuclear protein Y degradation      | 1.7554  | 0.7602 | 0.2867  | 7.8684   | 0.4106  | 4.5515  | 5.421   |
| P51 | <i>n7</i>  | Constant regulation by protein LHY                       | 0.0052  | 0.4094 | 0.1353  | 0.0359   | 0.06    | 3.9315  | 0.2572  |
| P52 | <i>g6</i>  | Constant of repression by LHY                            | 0.0613  | 1.1662 | 19.6203 | 2.3461   | 0.9981  | 10.6559 | 2.6725  |
| P53 | <i>q2</i>  | Coupling constant of light activation of Y transcription | 28.4839 | 4.6552 | 121.059 | 112.8891 | 99.3433 | 3.7924  | 13.3767 |
| P54 | <i>b</i>   | Hill coefficient of activation by protein Y              | 1.0681  | 1.1896 | 1.0711  | 2.8985   | 1.0281  | 2.277   | 1.1647  |
| P55 | <i>a</i>   | Hill coefficient of activation by protein X              | 3.144   | 3.7638 | 3.9613  | 3.1829   | 3.8861  | 3.7535  | 2.3391  |
| P56 | <i>c</i>   | Hill coefficient of activation by protein TOC1           | 1.4672  | 2.188  | 1.6784  | 1.5472   | 3.5827  | 4       | 1.7748  |
| P57 | <i>e</i>   | Hill coefficient of repression by protein LHY for Y      | 1.0588  | 1      | 1.8493  | 1.499    | 1.7576  | 1.0095  | 1.6571  |
| P58 | <i>d</i>   | Hill coefficient of activation by protein TOC1 for Y     | 3.5161  | 2.5409 | 4       | 1.5366   | 1.8123  | 3.4889  | 3.8342  |

## References

1. Locke JCW, Millar, A. J., Turner M. S. : **Modelling genetic networks with noisy and varied experimental data: the circadian clock in *Arabidopsis thaliana*.** *Journal of Theoretical Biology* 2005, **234**:383-393.
2. Locke JCW, Southern, M. M., Kozma-Bognar, L., Hibberd, V., Brown, P. E., Turner, M. S., Millar, A. J.: **Extension of a genetic network model by iterative experimentation and mathematical analysis.** *Molecular Systems Biology* 2005.
