# Supplementary material for: Consistent Robustness Analysis (CRA) Identifies Biologically Relevant Properties of Regulatory Network Models
Source: PubMed Central journal article supplement (PMC3002950; doi:10.1371/journal.pone.0015589), 2010-12-16
Supplement: pone.0015589.s002.pdf [file pone.0015589.s002.pdf]

**Table S3** The experimental data for Arabidopsis circadian clock modelling

| Backgrounds           | Genes           | Photoperiods* | References                                                                                                                                  |
|-----------------------|-----------------|---------------|---------------------------------------------------------------------------------------------------------------------------------------------|
| wild-type             | <i>LHY/CCA1</i> | LL            | Mizoguchi <i>et al.</i> (2002) <i>Developmental Cell</i> , 2, 629-641<br>Kim <i>et al.</i> (2003) <i>The EMBO Journal</i> , 22 (4), 935-944 |
|                       |                 | 16L8D         | Mizoguchi <i>et al.</i> (2002) <i>Developmental Cell</i> , 2, 629-641                                                                       |
|                       |                 | 8L16D         | Roden <i>et al.</i> (2001) <i>Cell &amp; Developmental Biology</i> , 12, 305-315                                                            |
|                       |                 | DD            | Salome <i>et al.</i> (2005) <i>The Plant Cell</i> , 17, 791-803                                                                             |
|                       | <i>TOC1</i>     | LL            | Mizoguchi <i>et al.</i> (2002) <i>Developmental Cell</i> , 2, 629-641                                                                       |
|                       |                 | 16L8D         | Mizoguchi <i>et al.</i> (2002) <i>Developmental Cell</i> , 2, 629-641                                                                       |
|                       |                 | 8L16D         | Edwards K. unpublished data                                                                                                                 |
|                       |                 | DD            | Salome <i>et al.</i> (2005) <i>The Plant Cell</i> , 17, 791-803                                                                             |
|                       | <i>GI</i>       | LL            | Mizoguchi <i>et al.</i> (2002) <i>Developmental Cell</i> , 2, 629-641                                                                       |
|                       |                 | 16L8D         | Mizoguchi <i>et al.</i> (2002) <i>Developmental Cell</i> , 2, 629-641                                                                       |
| lhycca1 double mutant | <i>TOC1</i>     | LL            | Mizoguchi <i>et al.</i> (2002) <i>Developmental Cell</i> , 2, 629-641                                                                       |
|                       | <i>GI</i>       | LL            | Mizoguchi <i>et al.</i> (2002) <i>Developmental Cell</i> , 2, 629-641                                                                       |

\* Notes: LL – constant light, 16L8D – 16 hours of light and 8 hours of darkness, 8L16D – 8 hours of light and 16 hours of darkness, and DD – constant darkness.
