# Supplementary material for: Consistent Robustness Analysis (CRA) Identifies Biologically Relevant Properties of Regulatory Network Models
Source: PubMed Central journal article supplement (PMC3002950; doi:10.1371/journal.pone.0015589), 2010-12-16

**Figure S3** The fit results of RNA expression time-series from the two-loop model using re-optimised parameter sets:  $L9$ ,  $L12$ ,  $L13$ ,  $L14$ ,  $L27$  and  $L39$  (the re-optimised parameter sets of *set9*, *set12*, *set13*, *set14*, *set27* and *set39*, respectively). Here, three selected simulations of all twelve fitted RNA time-series were presented, comprising of *TOC1* expression in wild-type under constant light (WT-LL) and 16:8 light;dark cycle (WT-16L8D), and *TOC1* expression in *lhycca1* double mutant under constant light (*lhycca*-LL) The blue solid line with marker demonstrates the experimental data while the pink and red solid line indicates the model simulated results. The y-axis is the RNA concentration, while the x-axis is time in hour.

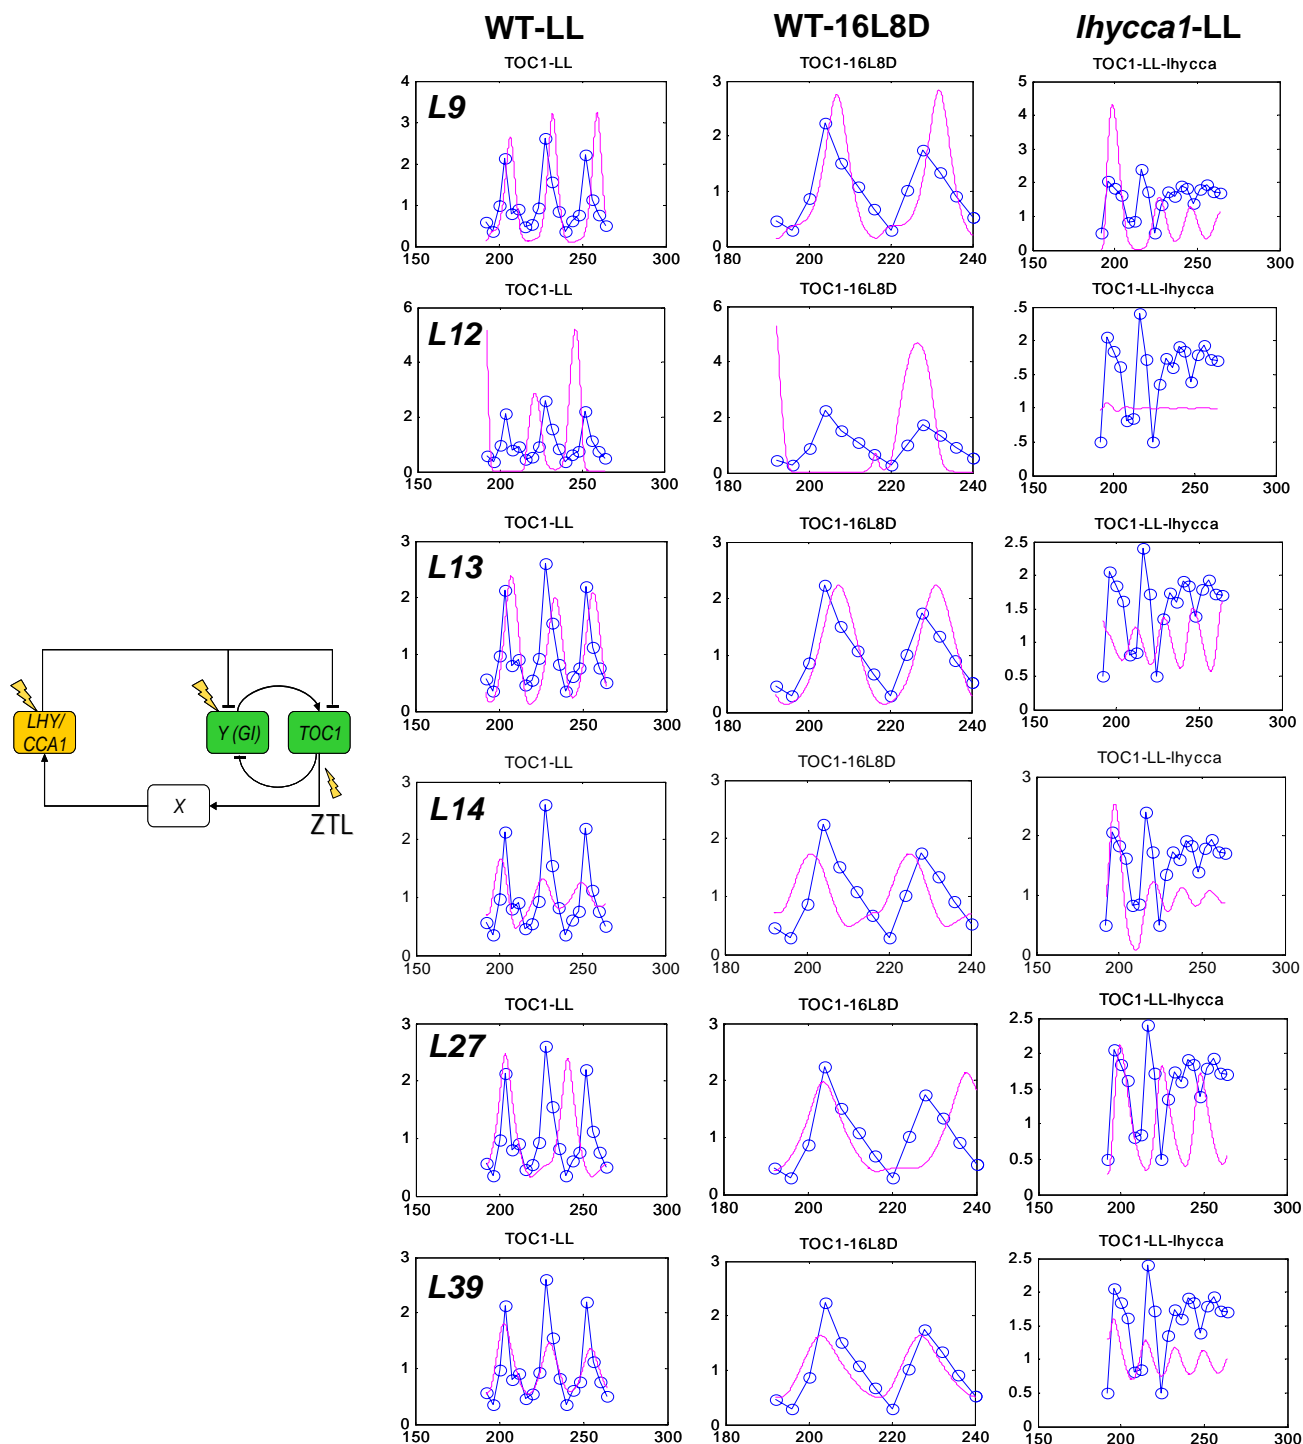

Supplement: pone.0015589.s005.pdf [file pone.0015589.s005.pdf]
