# Supplementary material for: Consistent Robustness Analysis (CRA) Identifies Biologically Relevant Properties of Regulatory Network Models
Source: PubMed Central journal article supplement (PMC3002950; doi:10.1371/journal.pone.0015589), 2010-12-16

**Figure S4** The sensitivity respect to parameters in the two-loop model calculated in various parameter sets: (a) *L9* (b) *L12* (c) *L13* (d) *L14* (e) *L27* (f) *L39*. The heatmap plots the sensitivity and robustness of the model at any parameters (row) and perturbations (column).

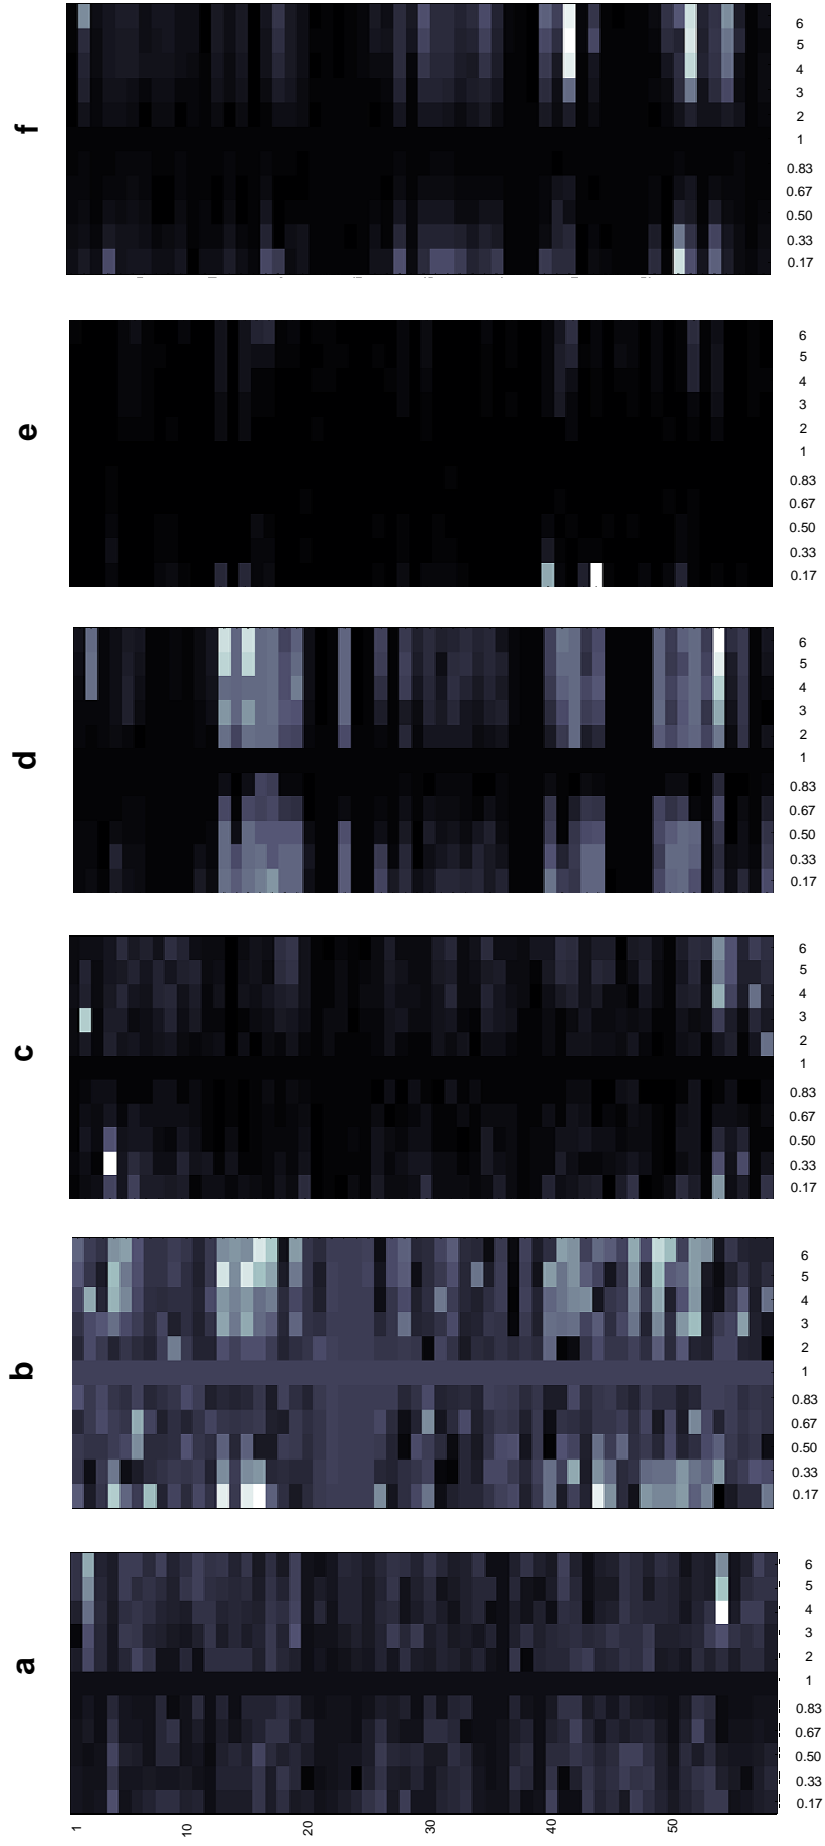

Supplement: pone.0015589.s006.pdf [file pone.0015589.s006.pdf]
