# Supplementary material for: Consistent Robustness Analysis (CRA) Identifies Biologically Relevant Properties of Regulatory Network Models
Source: PubMed Central journal article supplement (PMC3002950; doi:10.1371/journal.pone.0015589), 2010-12-16

**Figure S5** The percent consistency (PC) of the sensitive parameters among the reference parameter sets calculated based on the different criteria of sensitivity coefficients was plotted according to the genes (a) and molecular processes (b) (TL= translation and T = Transportation)

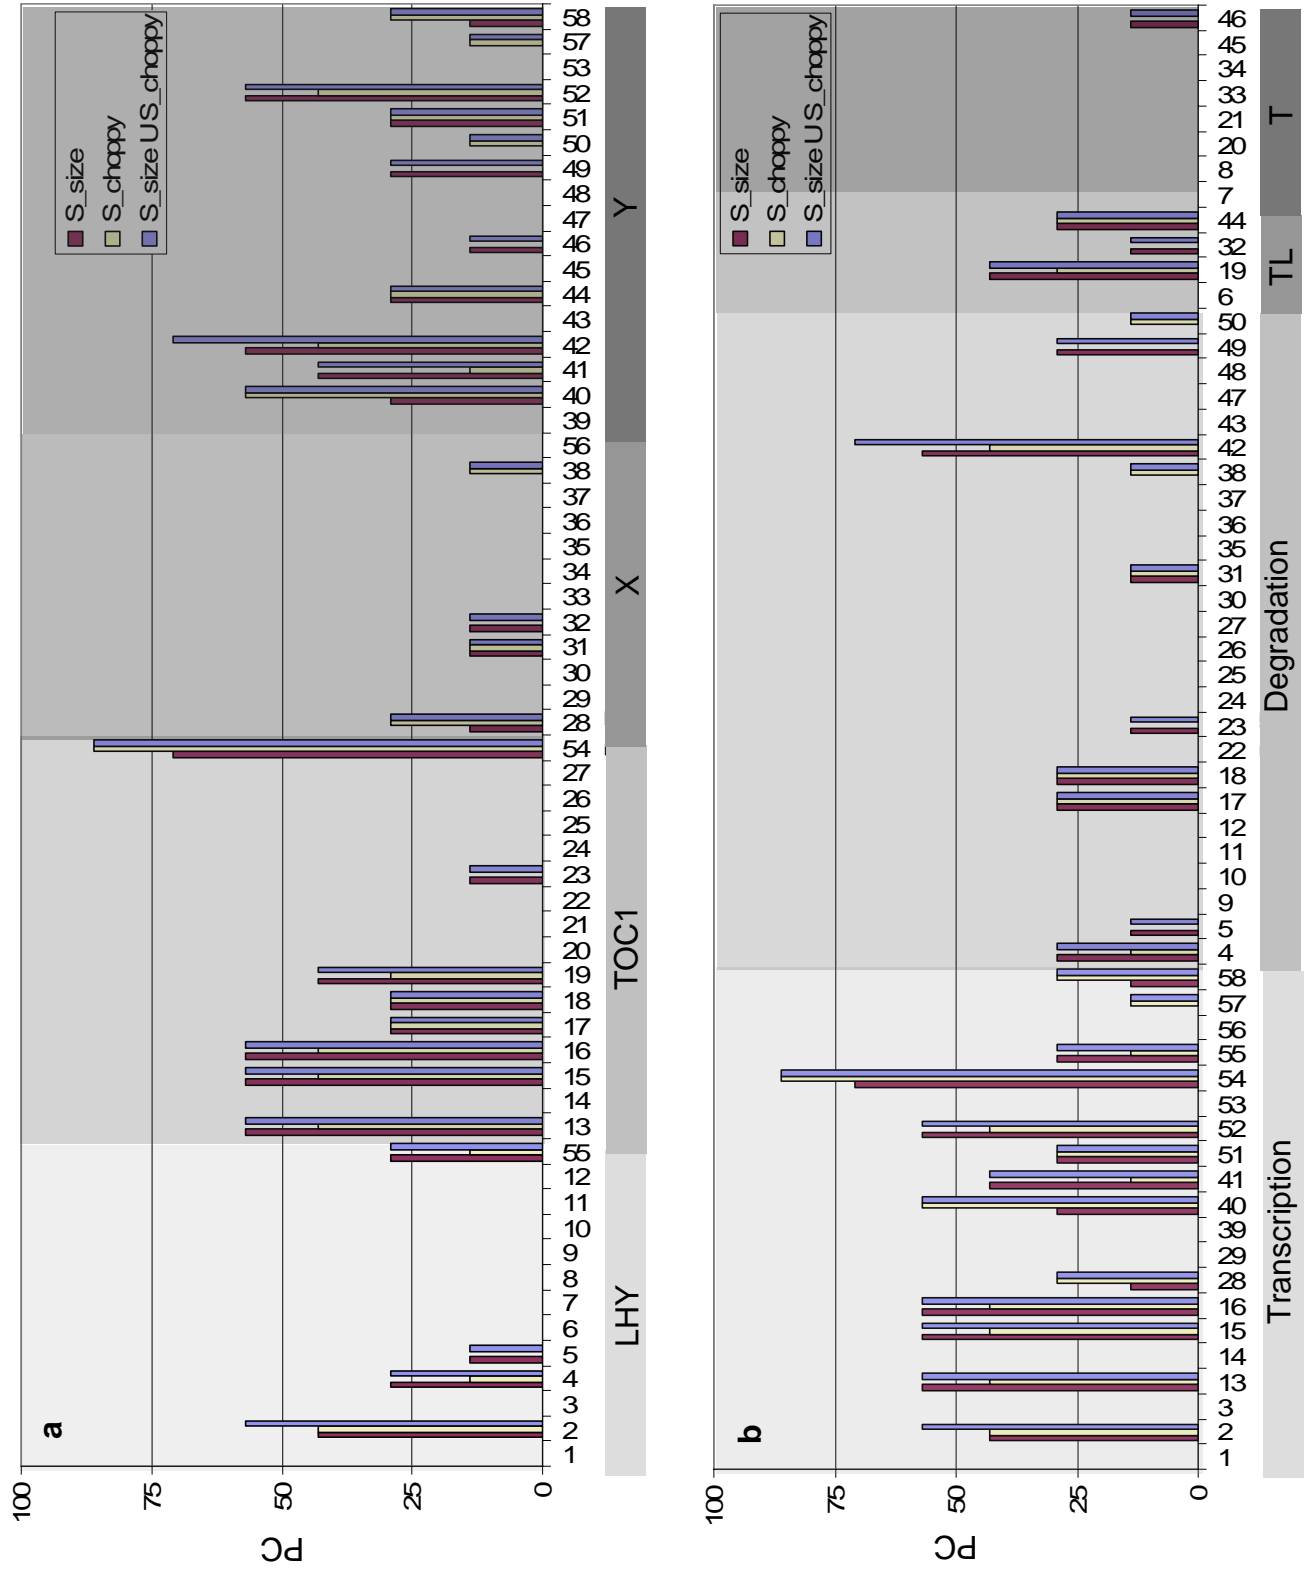

Supplement: pone.0015589.s007.pdf [file pone.0015589.s007.pdf]
