# Supplementary material for: Consistent Robustness Analysis (CRA) Identifies Biologically Relevant Properties of Regulatory Network Models
Source: PubMed Central journal article supplement (PMC3002950; doi:10.1371/journal.pone.0015589), 2010-12-16

**Figure S6** The percent consistency (PC) of the parameters obtained from different degree of strictness (0.5SD ( $m = 0.5$ ) (a) and 2SD ( $m = 2$ ) (b)) to classify the sensitive parameters ( based on  $S^{size}$  and  $S^{choppy}$ ) was plotted according to the (1) genes and molecular processes (2) (TL= translation and T = Transportation). The consistently sensitive parameters marked as black bars were classified based on 50 percent consistency cut-off.

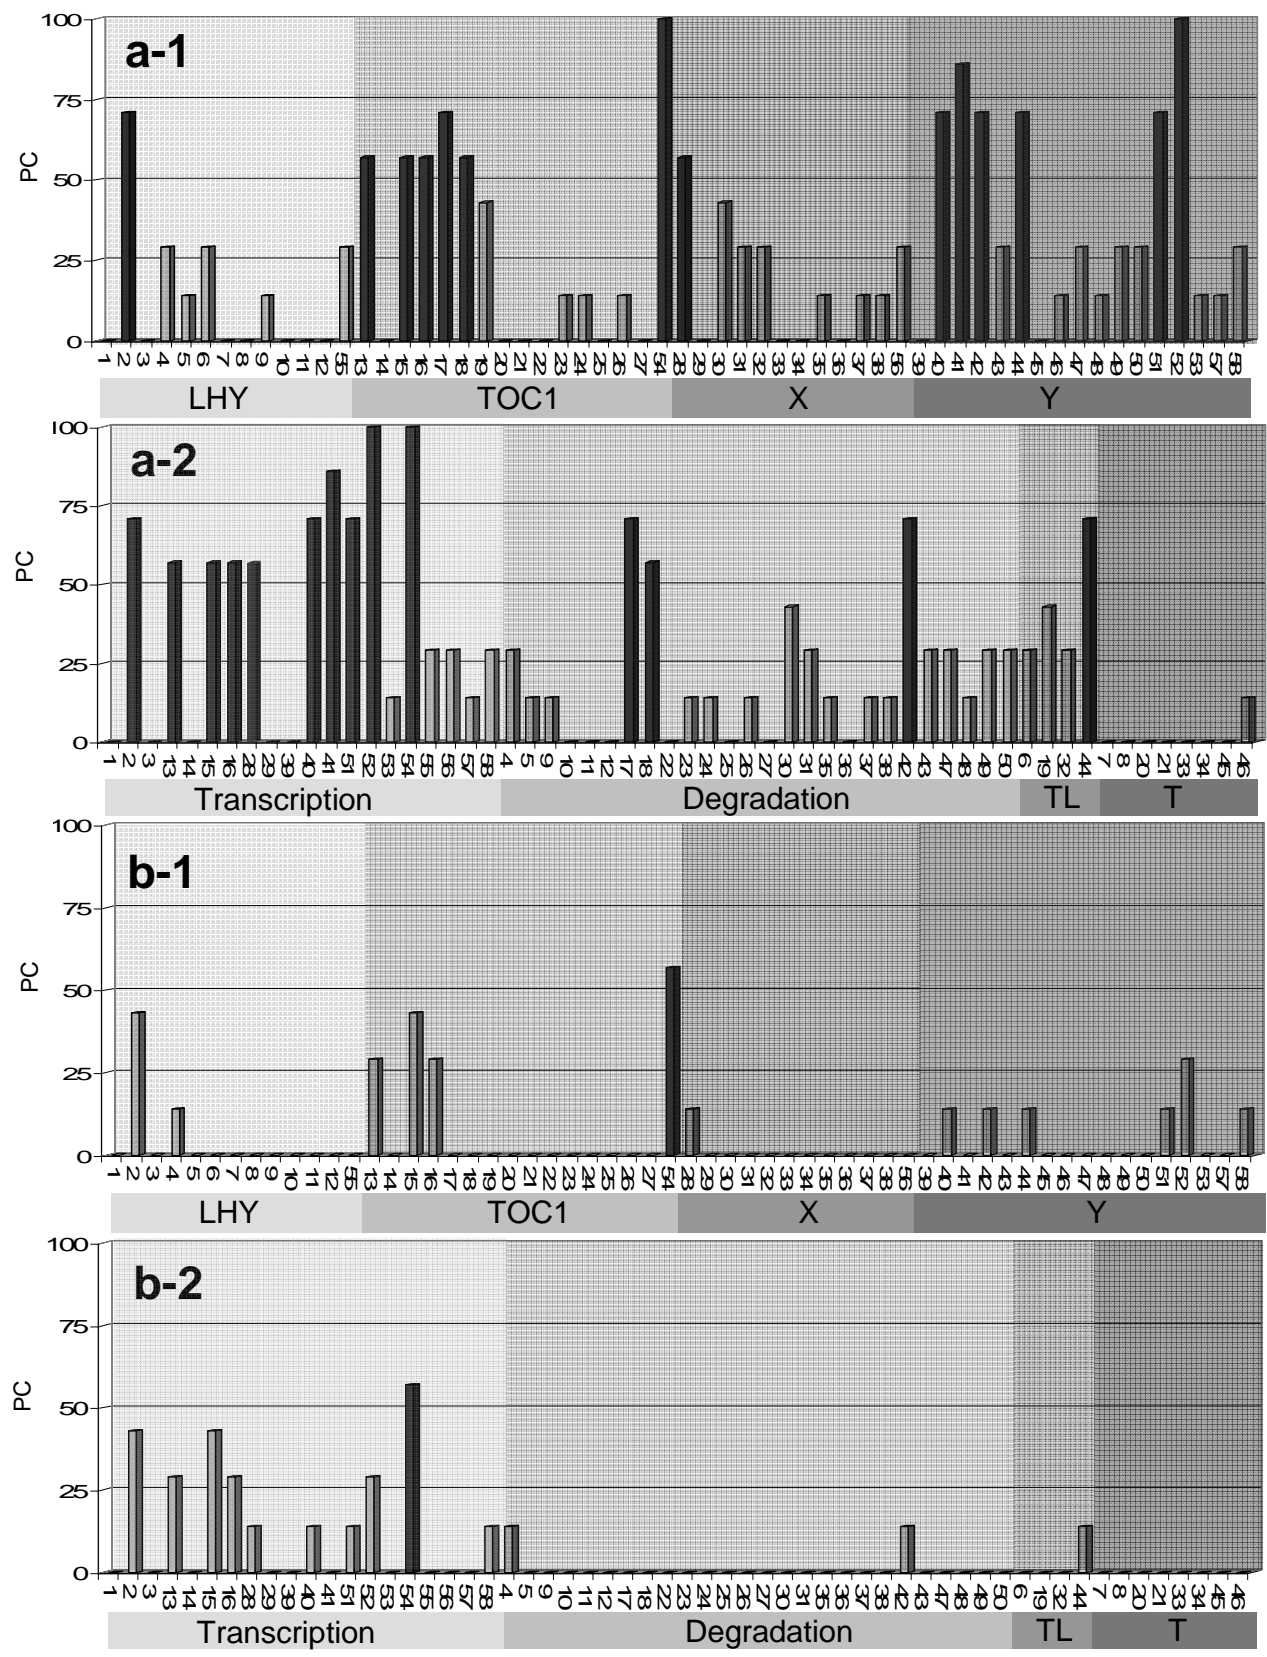

Supplement: pone.0015589.s008.pdf [file pone.0015589.s008.pdf]
